# Supplementary material
Source: PubMed Central journal article supplement (PMC9210964)
Supplement: jb.00110-22-s0002.pdf [file jb.00110-22-s0002.pdf]

1 Supporting Information

2  
3 Molecular connectivity between extra-cytoplasmic sigma factors and PhoP accounts for coupled  
4 mycobacterial stress response

5  
6 Harsh Goar<sup>1</sup>, Partha Paul<sup>1</sup>, Hina Khan<sup>1</sup>, and Dibyendu Sarkar<sup>1, \*</sup>

7  
8  
9 <sup>1</sup>CSIR-Institute of Microbial Technology, Sector 39 A, Chandigarh 160036, India

10  
11  
12 Running title: Coupling mycobacterial pH stress and redox stress response

13  
14  
15 Key Words: Mycobacterium; PhoP; Redox stress; SigH; pH stress; thiol homeostasis

16  
17  
18  
19 \*Address correspondence to: Dibyendu Sarkar, CSIR-Institute of Microbial Technology,

20 Tel.: 091-172-2880258; Fax: 091-172-2690585; E-mail: [dibyendu@imtech.res.in](mailto:dibyendu@imtech.res.in)

21  
22  
23  
24  
25  
26

27 **Table S4**

28

29 Oligonucleotide primer sequences and plasmids used for amplifications and cloning in this study

30

| Primers                    | Sequence (5'-3') or relevant genotype                            | Reference     |
|----------------------------|------------------------------------------------------------------|---------------|
| GST-phoPstart              | CCTGGATCCATGCGGAAAGGGGTT                                         | (1)           |
| RPphoPN                    | AATAATCTCGAGGCGTCGCAGGATGA                                       | This study    |
| FPphoPC                    | AATAATGGATCCAAGGGCAACAAGGAACCA                                   | This study    |
| GST-phoPstop               | GGTCTCGAGTCGAGGCTCCCGCAG                                         | (1)           |
| FPsigH19K                  | AATAATGGATCCATGGCCGACATC                                         | This study    |
| RPsigH19K                  | AATAAGCTTTCACCTTGTCTGCATCGTCTTTGTA<br>GTCTGACGACACCCCT           | This study    |
| FPrshA                     | AATAATCAATTGGTGAGCGAAAAT                                         | This study    |
| RPrshA                     | AATAATAAGCTTCTAGGGCCCTCC                                         | This study    |
| Plasmids                   |                                                                  |               |
| pGEX-4T-1 <sup>a</sup>     | <i>E. coli</i> cloning vector                                    | GE-Healthcare |
| pGEX- <i>phoP</i>          | PhoP residues 1-247 cloned in pGEX-4T-1                          | (1)           |
| pGEX- <i>phoPN</i>         | PhoP residues 1-141 cloned in pGEX-4T-1                          | This study    |
| pGEX- <i>phoPC</i>         | PhoP residues 141-247 cloned in pGEX-4T-1                        | This study    |
| pET-28c <sup>c</sup>       | <i>E. coli</i> cloning vector                                    | Novagen       |
| pET-SigE                   | His <sub>6</sub> -tagged SigE expression plasmid                 | (2)           |
| pET-SigH                   | His <sub>6</sub> -tagged SigH expression plasmid                 | (2)           |
| p19Kpro <sup>b</sup>       | Mycobacterial expression vector                                  | (3)           |
| p19Kpro- <i>phoP</i> -His  | PhoP residues 1–247 cloned in p19Kpro with His <sub>6</sub> -tag | (4)           |
| p19Kpro- <i>phoP</i> -FLAG | PhoP residues 1–247 cloned in p19Kpro with FLAG tag              | (5)           |
| p19Kpro- <i>sigH</i> -FLAG | SigH residues 1-216 cloned in p19Kpro with FLAG tag              | This study    |
| Mrx1-roGFP <sup>2b</sup>   | Mycoredoxin gene cloned upstream of redox sensitive GFP          | (6)           |
| pSM128 <sup>d</sup>        | Integrative promoter probe vector for mycobacteria               | (7)           |
| pSM-trxB1up                | trxB1up- <i>lacZ</i> fusion in pSM128                            | This work     |
| pUAB300 <sup>b</sup>       | Episomal mycobacteria- <i>E. coli</i> shuttle plasmid            | (8)           |
| pUAB300- <i>sigE</i>       | SigE residues 1-257 cloned in pUAB300                            | (2)           |
| pUAB300- <i>sigH</i>       | SigH residues 1-216 cloned in pUAB300                            | (2)           |
| pUAB400 <sup>c</sup>       | Integrative mycobacteria- <i>E. coli</i> shuttle plasmid         | (8)           |
| pUAB400- <i>phoP</i>       | PhoP residues 1–247 cloned in pUAB400                            | (9)           |
| pUAB400- <i>phoPN</i>      | PhoP residues 1–141 cloned in pUAB400                            | (5)           |
| pUAB400- <i>phoPC</i>      | PhoP residues 141–247 cloned in pUAB400                          | (5)           |
| pUAB400- <i>cfp10</i>      | CFP10 residues 1-100 cloned in pUAB400                           | (2)           |
| pUAB400- <i>rshA</i>       | RshA residues 1-101 cloned in pUAB400                            | This study    |

31

32 <sup>a</sup> ampicillin resistance; <sup>b</sup> hygromycin resistance; <sup>c</sup> kanamycin resistance; <sup>d</sup> streptomycin resistance

33 FP, forward primer; RP, reverse primer

34

35

36 **Table S5**

37  
38  
39  
40  
41  
42

Oligonucleotide primers used in RT-qPCR and ChIP experiments of this study

| Primers     | Sequence or description (5'-3') | Reference  |
|-------------|---------------------------------|------------|
| FPtrxB1RT   | GAAACCATCCAAAGCAGCGA            | This study |
| RPtrxB1RT   | GGGGATGGATCGGATCTGAG            | This study |
| FPtrxB2RT   | GTGGAGAACTACCCGGGATT            | This study |
| RPtrxB2RT   | CCCGTGAAGTGATACCGACT            | This study |
| FPtrxCRT    | GGTTGACTTTTGGGCGACAT            | This study |
| RPtrxCRT    | TCGAGACGACCTGGAAGTTG            | This study |
| FPphoPRT    | GCCTCAAGTTCAGGGCTTT             | This study |
| RPphoPRT    | CCGGGCCCGATCCA                  | This study |
| FPpks2RT    | GTTGTGGAAGGCGTTGTTAC            | (10)       |
| RPpks2RT    | GTCGTAGAACTCGTCGCAAT            | (10)       |
| FPgapdhRT   | AGTAGGCATCAACGGGTTTG            | (9)        |
| RPgapdhRT   | GTGCTGTTGTCGGTGATGTC            | (9)        |
| FPtrxB1up   | TGGCCTCGATCGCCGGGGTC            | This study |
| RPtrxB1up   | GTGTTTTTCCGACGACTCGGCAA         | This study |
| FPtrxB2up   | ACGCTCGGCCCGCCGTA CTGCTGG       | This study |
| RPtrxB2up   | GGCACGGGCGGCGTAGAGCG            | This study |
| FPtrxC ORF  | GTACCACCAGCACCTCACT             | This study |
| RPtrxC ORF  | CCATCTTGCAAGGTCCACAC            | This study |
| FPespAup    | CGTGATCTTGATACGGCTCG            | (4)        |
| RPespAup    | GTTGTTGGTACCCTCGGCAAGATCGGC     | (4)        |
| FP16SrDNAup | CTGAGATACGGCCAGACTC             | (9)        |
| RP16SrDNAup | CGTCGATGGTGAAAGAGGTT            | (9)        |

43  
44  
45

FP, forward primer; RP, reverse primer

46 **Figure S1**

47

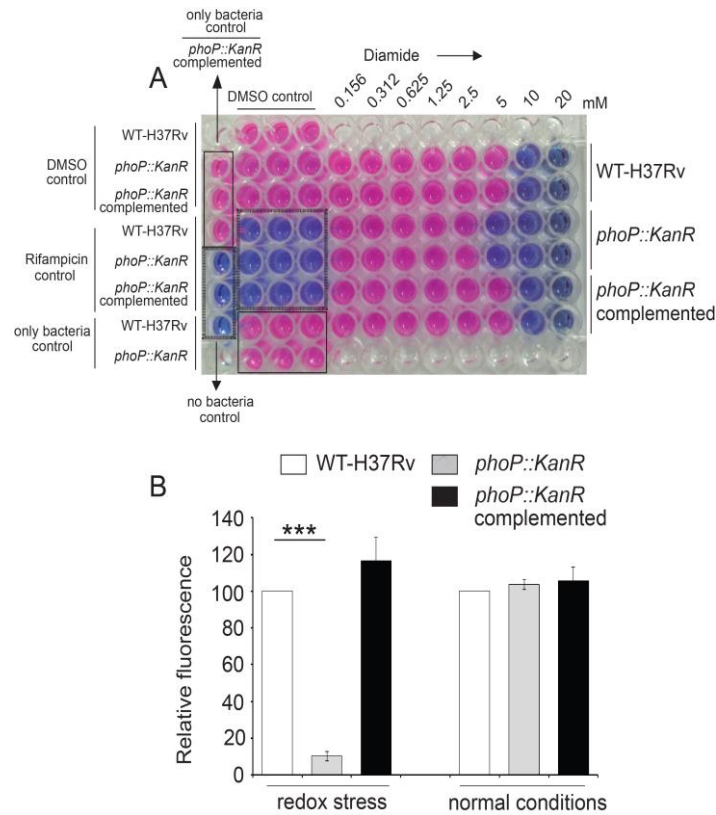

48

49

50

51

52 **Fig. S1: PhoP contributes a major role in mycobacterial survival under oxidative stress.** (A) In  
 53 this experiment, we compared metabolic activity of WT, and *phoP::KanR* mutant grown in presence  
 54 of increasing concentrations of diamide by using Alamar Blue assay. Because reduction of Alamar  
 55 Blue correlates with the change of a non-fluorescent blue to a fluorescent pink appearance,  
 56 mycobacterial metabolic activity could be quantitatively assessed by monitoring fluorescence. (B)  
 57 Bacterial metabolic activity in presence of carry-over concentrations of DMSO and in presence of 5  
 58 mM diamide were assessed relative to corresponding WT-H37Rv cultures (considered as 100%). The  
 59 following controls were included in the Alamar Blue assays: (i) DMSO control of WT-H37Rv,  
 60 *phoP::KanR* mutant and the complemented mutant, grown in presence of carryover DMSO, (ii)  
 61 Rifampicin control (indicated by a dotted square), showing mycobacterial growth inhibition to  
 62 confirm validity of the assay, (iii) only bacteria as a control indicated by a square at the left bottom of  
 63 the plate and another rectangle at the left top corner, and (iv) no bacteria control shown by a dotted  
 64 rectangle and indicated at the left bottom corner of the plate.

65

66

67

68 **Figure S2**

69

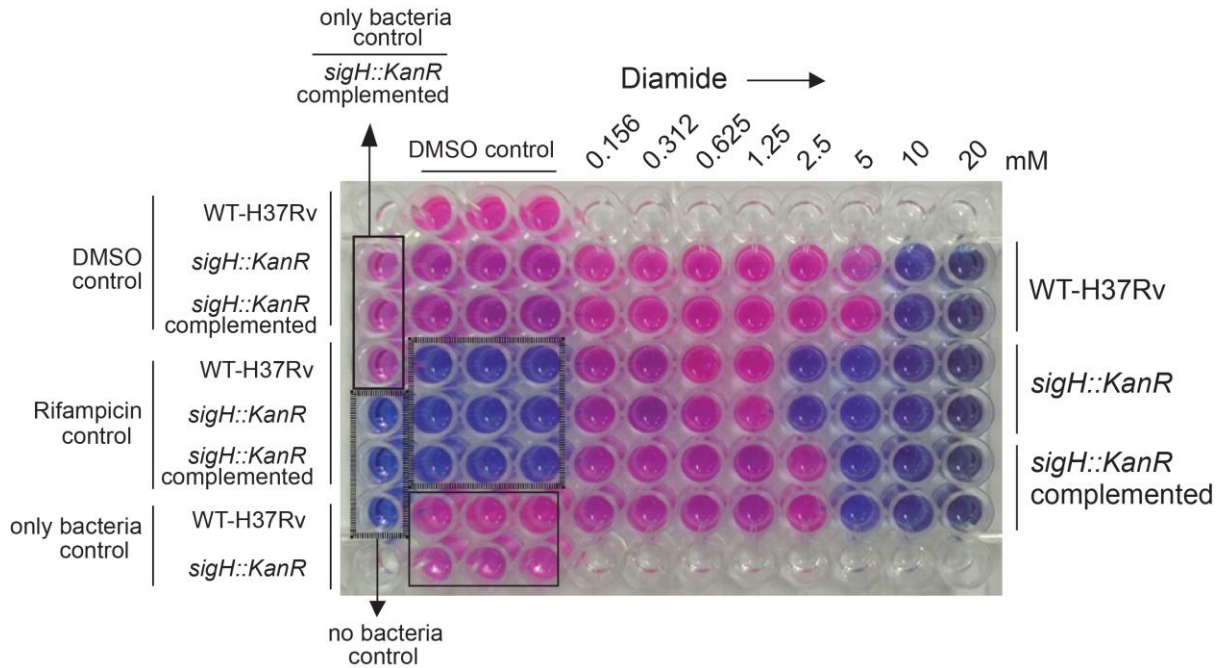

70

71

72

73

74

75

76

77

78

79

80

81

82

83

84 **Fig. S2: SigH plays a major role in mycobacterial survival under oxidative stress.** To examine  
 85 sensitivity of  $\text{sigH}::\text{KanR}$  to oxidative stress, we compared metabolic activity of WT-H37Rv, and the  
 86 mutant bacilli to increasing concentrations of diamide by using Alamar Blue assay, as described in the  
 87 Experimental procedures. Because reduction of Alamar Blue correlates with the change of a non-  
 88 fluorescent blue to a fluorescent pink appearance, mycobacterial metabolic activity could be  
 89 quantitatively assessed by monitoring fluorescence. The following controls were included in the  
 90 Alamar Blue assays: (i) DMSO control of WT-H37Rv,  $\text{sigH}::\text{KanR}$  mutant and the complemented  
 91 mutant, grown in presence of carryover DMSO, (ii) Rifampicin control (indicated by a dotted square),  
 92 showing mycobacterial growth inhibition to confirm validity of the assay, (iii) only bacteria as a  
 93 control indicated by a square at the left bottom of the plate and another rectangle at the left top corner,  
 94 and (iv) no bacteria control shown by a dotted rectangle and indicated at the left bottom corner of the  
 95 plate.

96

97

98

99  
100  
101  
102  
103

**Figure S3**

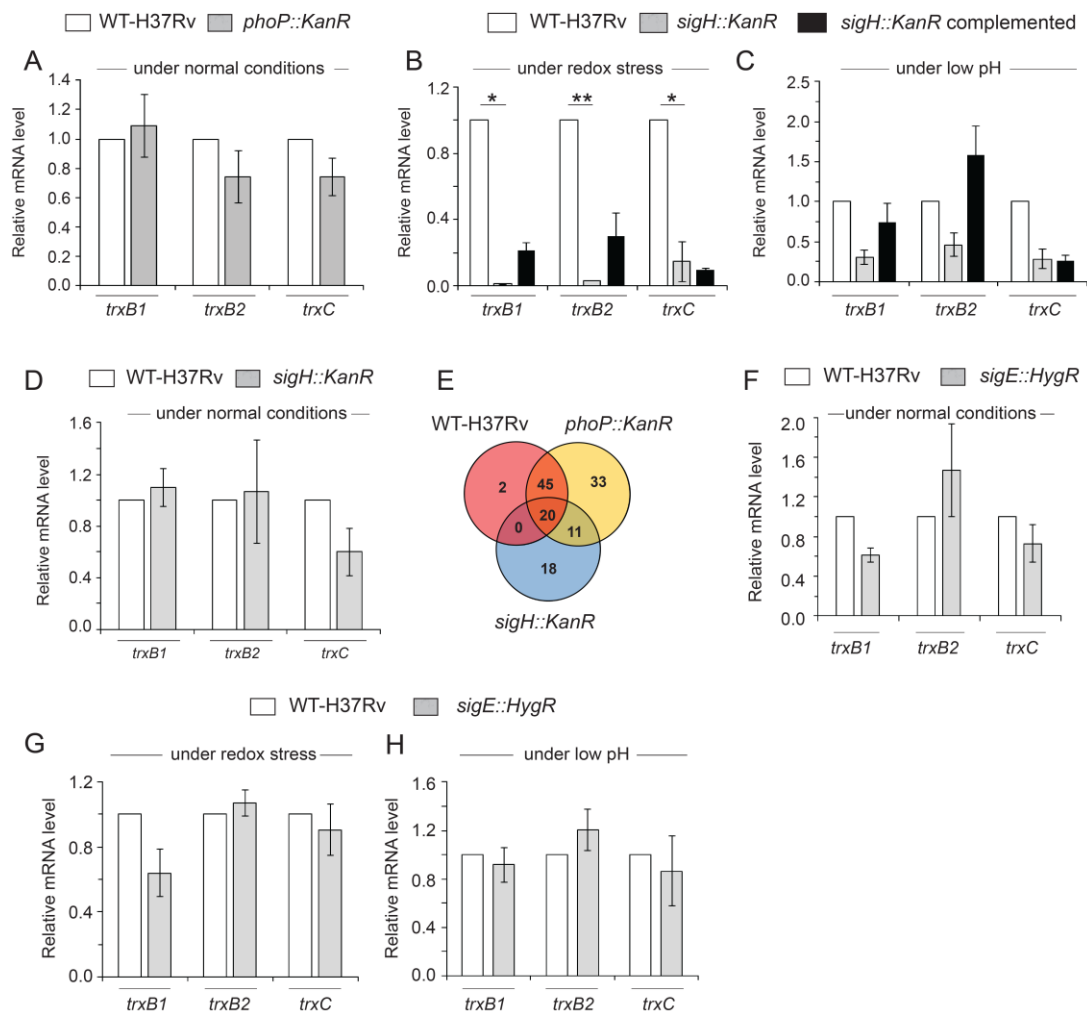

104  
105  
106  
107  
108  
109  
110  
111  
112  
113  
114  
115  
116  
117  
118  
119  
120  
121

**Fig. S3: Regulation of mycobacterial thioredoxin gene expression.** (A-D and F-H), expression of redox-active thioredoxin genes in WT-H37Rv, and indicated *M. tuberculosis* H37Rv mutants, grown under normal conditions, or under specific stress conditions (as indicated on the figure) were examined by RT-qPCR, and the results were analysed as described in the legend to Fig. 2B. The average fold difference in expression levels were determined from three independent RNA preparations (\* $P < 0.05$ ; \*\* $P < 0.01$ ); nonsignificant difference is not indicated. (E) Venn diagram of genes upregulated (>2-fold;  $p < 0.05$ ) in diamide treated WT-H37Rv and *phoP::KanR* against their corresponding normal controls, as determined by RNA sequencing analysis [Table S5 (Excel spreadsheet)], significantly overlap with the genes which belong to *sigH* regulon (11,12). The analyses of results involve comparison of genes annotated in the H37Rv genome.

122 **Figure S4**

123  
124  
125  
126  
127

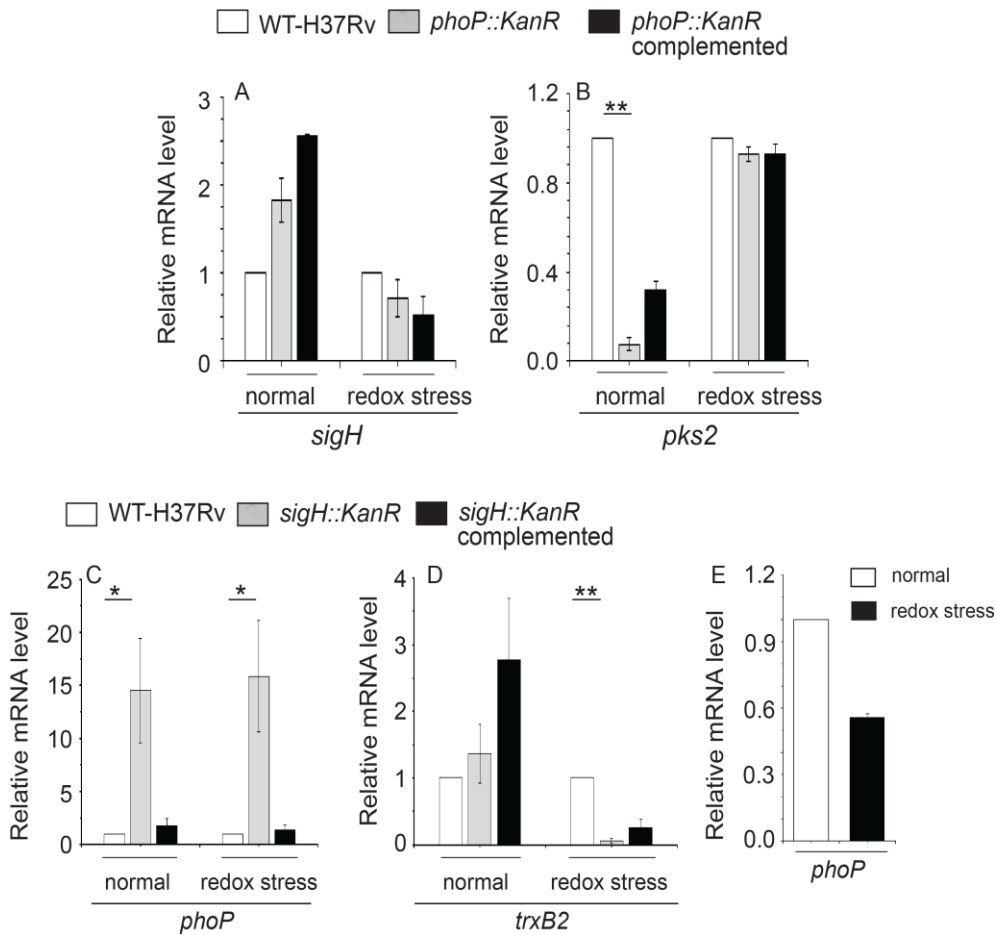

128  
129  
130  
131  
132  
133  
134  
135  
136  
137  
138  
139  
140  
141  
142  
143  
144  
145  
146  
147  
148  
149

**Fig. S4: PhoP expression appears to be under the control of mycobacterial *sigH* locus.** mRNA levels of (A) *sigH*, and (C) *phoP* was compared by RT-qPCR using indicated mycobacterial strains, grown under normal conditions or in presence of 5 mM diamide. As controls, panels B and D show expression levels of mycobacterial *pks2*, a member of the PhoP regulon, and *trxB2*, a representative gene of the SigH regulon, respectively. Panel E measured expression of *phoP* in WT *M. tuberculosis* H37Rv, grown under normal and redox conditions. In contrast to *sigH*, expression level of *phoP* was lower under redox stress relative to normal conditions of mycobacterial growth. Relative fold difference in gene expression levels were determined as described in the legend to Fig. 2B. Nonsignificant difference is not indicated.

150 **Figure S5**

151

152

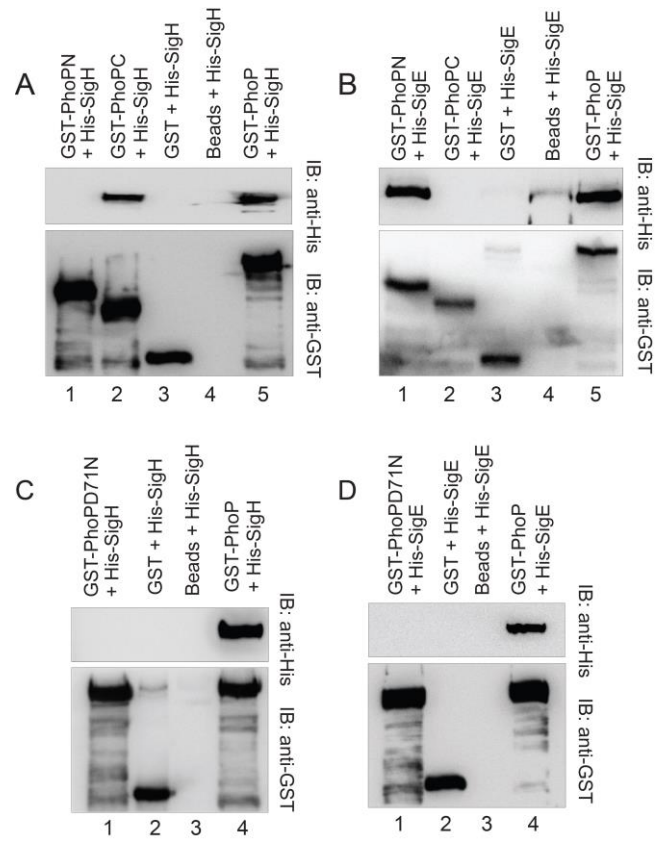

153

154

155

156

157

158 **Fig. S5: Probing SigH/SigE interacting domains of PhoP.** To examine protein-protein interaction  
 159 by *in vitro* pull-down assays, recombinant His<sub>6</sub>-tagged SigH (A) or SigE (B) was incubated with  
 160 glutathione-Sepharose, previously immobilized with GST-tagged PhoPN (lane 1), GST-tagged PhoPC  
 161 (lane 2), GST alone (lane 3), resin alone (lane 4), or GST-tagged PhoP (lanes 5). Likewise, to  
 162 examine the effect of phosphorylation of PhoP on PhoP-SigH/SigE interactions, recombinant His<sub>6</sub>-  
 163 tagged SigH (C) or SigE (D) was incubated with glutathione-Sepharose, previously immobilized with  
 164 GST-tagged PhoPD71N, a mutant PhoP unable to be phosphorylated *in vitro* (lane 1), GST alone  
 165 (lane 2), resin alone (lane 3), or GST-tagged PhoP (lanes 4). In all cases, fractions of bound proteins  
 166 were analysed by Western blot using anti-His (upper panel) or anti-GST antibody (lower panel), as  
 167 described in the Experimental procedures.

168

169

170



171 **References**

172

- 173 1. Gupta, S., Pathak, A., Sinha, A., and Sarkar, D. (2009) Mycobacterium tuberculosis PhoP  
174 recognizes two adjacent direct-repeat sequences to form head-to-head dimers. *J Bacteriol*  
175 **191**, 7466-7476
- 176 2. Bansal, R., Anil Kumar, V., Sevalkar, R. R., Singh, P. R., and Sarkar, D. (2017) Mycobacterium  
177 tuberculosis virulence-regulator PhoP interacts with alternative sigma factor SigE during  
178 acid-stress response. *Mol Microbiol* **104**, 400-411
- 179 3. De Smet, K. A., Kempell, K. E., Gallagher, A., Duncan, K., and Young, D. B. (1999) Alteration  
180 of a single amino acid residue reverses fosfomycin resistance of recombinant MurA from  
181 Mycobacterium tuberculosis. *Microbiology* **145 ( Pt 11)**, 3177-3184
- 182 4. Anil Kumar, V., Goyal, R., Bansal, R., Singh, N., Sevalkar, R. R., Kumar, A., and Sarkar, D.  
183 (2016) EspR-dependent ESAT-6 Protein Secretion of Mycobacterium tuberculosis Requires  
184 the Presence of Virulence Regulator PhoP. *J Biol Chem* **291**, 19018-19030
- 185 5. Singh, P. R., Vijjamarri, A. K., and Sarkar, D. (2020) Metabolic Switching of Mycobacterium  
186 tuberculosis during Hypoxia Is Controlled by the Virulence Regulator PhoP. *J Bacteriol* **202**
- 187 6. Bhaskar, A., Chawla, M., Mehta, M., Parikh, P., Chandra, P., Bhawe, D., Kumar, D., Carroll, K.  
188 S., and Singh, A. (2014) Reengineering redox sensitive GFP to measure mycothiol redox  
189 potential of Mycobacterium tuberculosis during infection. *PLoS Pathog* **10**, e1003902
- 190 7. Dussurget, O., Timm, J., Gomez, M., Gold, B., Yu, S., Sabol, S. Z., Holmes, R. K., Jacobs, W. R.,  
191 Jr., and Smith, I. (1999) Transcriptional control of the iron-responsive fxB gene by the  
192 mycobacterial regulator IdeR. *J Bacteriol* **181**, 3402-3408
- 193 8. Singh, A., Mai, D., Kumar, A., and Steyn, A. J. (2006) Dissecting virulence pathways of  
194 Mycobacterium tuberculosis through protein-protein association. *Proc Natl Acad Sci U S A*  
195 **103**, 11346-11351
- 196 9. Singh, R., Anil Kumar, V., Das, A. K., Bansal, R., and Sarkar, D. (2014) A transcriptional co-  
197 repressor regulatory circuit controlling the heat-shock response of Mycobacterium  
198 tuberculosis. *Mol Microbiol* **94**, 450-465
- 199 10. Goyal, R., Das, A. K., Singh, R., Singh, P. K., Korpole, S., and Sarkar, D. (2011) Phosphorylation  
200 of PhoP protein plays direct regulatory role in lipid biosynthesis of Mycobacterium  
201 tuberculosis. *J Biol Chem* **286**, 45197-45208
- 202 11. Manganelli, R., Voskuil, M. I., Schoolnik, G. K., Dubnau, E., Gomez, M., and Smith, I. (2002)  
203 Role of the extracytoplasmic-function sigma factor sigma(H) in Mycobacterium tuberculosis  
204 global gene expression. *Mol Microbiol* **45**, 365-374
- 205 12. Voskuil, M. I., Bartek, I. L., Visconti, K., and Schoolnik, G. K. (2011) The response of  
206 mycobacterium tuberculosis to reactive oxygen and nitrogen species. *Front Microbiol* **2**, 105

207

208
